# Supplementary material
Source: PubMed Central journal article supplement (PMC4004037)
Supplement: NIHMS495845-supplement-1_si_001.pdf [file NIHMS495845-supplement-1_si_001.pdf]

## Supporting Information

### Drug-Induced Conformational and Dynamical Changes of the S31N Mutant of the Influenza M2 Proton Channel Investigated by Solid-State NMR

Jonathan K. Williams, Daniel Tietze, Jun Wang, Yibing Wu, William F. DeGrado and Mei Hong\*

Department of Chemistry, Iowa State University, Ames, IA 50011

Department of Pharmaceutical Chemistry, University of California San Francisco, 94158-9001

#### Synthesis of deuterated WJ352 compounds

The synthesis of unlabeled **M2WJ332** and **M2WJ352** has been reported recently<sup>1</sup>. We describe below the modified procedure to synthesize two deuterated forms of WJ352. All chemicals were purchased from commercial vendors and used without further purification unless otherwise noted. <sup>1</sup>H and <sup>13</sup>C NMR spectra were recorded on a Bruker-300 NMR spectrometer. Chemical shifts are reported in parts per million with respect to residual solvent, CD<sub>3</sub>OD = 3.31 ppm and CD<sub>2</sub>Cl<sub>2</sub> = 5.30 ppm, or to the internal standard, tetramethylsilane = 0.00 ppm. The following abbreviations were used in reporting the NMR spectra: singlet (s), doublet (d), and triplet (t). All reactions were carried out under N<sub>2</sub> atmosphere unless otherwise stated. HPLC grade solvents were used for all the reactions. Flash column chromatography was performed using silica gel (230–400 mesh; Merck). Low-resolution mass spectrometry data were obtained using an electrospray ionization (ESI) technique on a 3200 Q Trap LC tandem MS system (Applied Biosystems).

#### *Synthesis of D5-M2WJ352*

A solution of phenyl-D5-acetylene (1mmol) in THF-H<sub>2</sub>O mixture (1:1) was cooled down to 0°C. Na<sub>2</sub>CO<sub>3</sub> (12 mmol) was added in one portion. A solution of 2-chloro-2-hydroxyiminoacetic acid ethyl ester (2.5mmol) in THF was added dropwise using a dropping funnel. The solution was stirred overnight and diluted with ethyl acetate. The layers were separated and the aqueous layer was extracted with ethyl acetate. The organic layers were combined, dried over MgSO<sub>4</sub>, filtered, and concentrated under reduced pressure. The resulting crude residue was purified by flash column chromatography (10% ethyl acetate/hexane) to give the isoxazole ester as a yellow solid (45% yield).

#### *Ethyl 5-D5-phenyl-1,2-oxazole-3-carboxylate*

<sup>1</sup>H NMR (300 MHz, CD<sub>2</sub>Cl<sub>2</sub>): δ 6.96 (s, 1H), 4.45 (q, *J* = 7.10 Hz, 2H), 1.44 (t, *J* = 7.10 Hz, 3H). <sup>13</sup>C NMR (75 MHz, CD<sub>2</sub>Cl<sub>2</sub>): 171.58, 159.91, 157.11, 130.29 (t, *J* = 23.56 Hz), 128.64 (t, *J* = 25.58 Hz), 126.51, 125.43 (t, *J* = 24.32 Hz), 99.93, 62.16, 13.95. EI-MS: *m/z* (M+H<sup>+</sup>): 223.1 (calculated), 223.3 (found).

Ethyl 5-D5-phenyl-1,2-oxazole-3-carboxylate (1 mmol) was dissolved in CH<sub>3</sub>OH. NaBH<sub>4</sub> (2 mmol) was added portionwise to avoid solvent boiling. The resulting solution was stirred overnight at room temperature. 1N HCl was added to quench the reaction. Solvent was

removed under reduced pressure and the residue was extracted with CH<sub>2</sub>Cl<sub>2</sub> and H<sub>2</sub>O. The alcohol intermediate, (5-D<sub>5</sub>-phenyl-1,2-oxazol-3-yl)methanol, was used for the next step bromination without further purification.

A

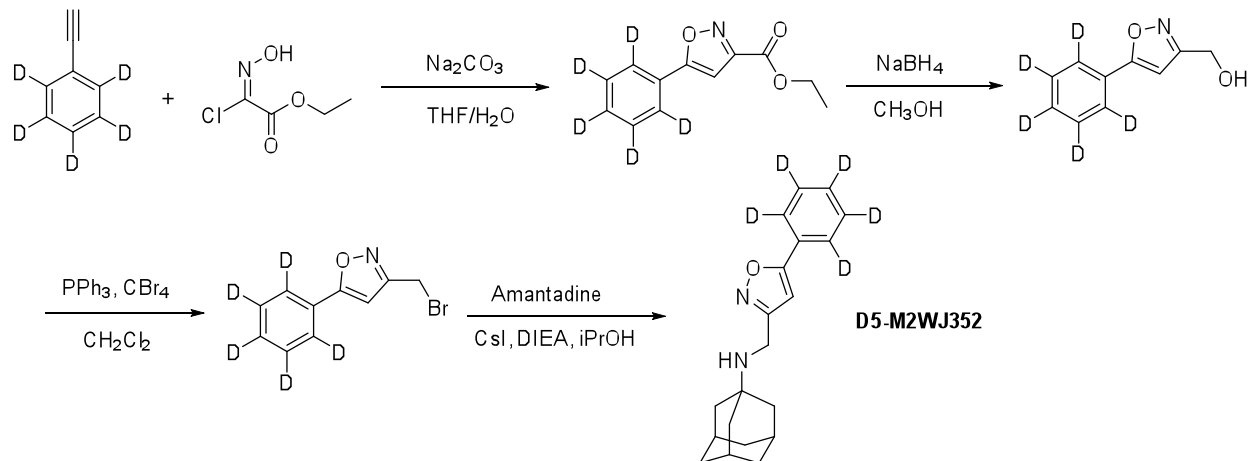

B

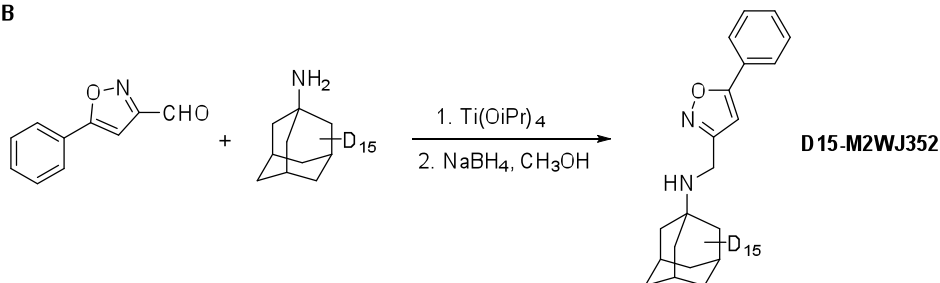

**Figure S1.** Synthesis scheme of deuterium-labeled **M2WJ352**. (A) Synthesis of **D5-M2WJ352**. Phenyl-D<sub>5</sub>-acetylene (Cat. # D-1086) was purchased from C.D.N isotopes Inc. (B) Synthesis of **D15-M2WJ352**. D<sub>15</sub>-labeled amantadine was prepared according to the previous published procedure<sup>2</sup>.

(5-D<sub>5</sub>-phenyl-1,2-oxazol-3-yl)methanol (1 mmol) was dissolved in CH<sub>2</sub>Cl<sub>2</sub>. CBr<sub>4</sub> (1.5 mmol) and PPh<sub>3</sub> (1.5 mmol) were added sequentially. The mixture was stirred at room temperature for 3 hrs. Then solvent was removed and the mixture was extracted with CH<sub>2</sub>Cl<sub>2</sub> and H<sub>2</sub>O. The organic layer was dried over MgSO<sub>4</sub>, filtered, and concentrated under reduced pressure. The bromide (1mmol) was added to a solution of amantadine (1.5mmol) in iPrOH. Then CsI (0.2 mmol) and DIEA (1.5 eq) were added. The resulting solution was heated to reflux overnight. Solvent was removed under reduced pressure. The residue was dissolved in CH<sub>2</sub>Cl<sub>2</sub> and extracted with H<sub>2</sub>O. The organic layer was separated, dried over MgSO<sub>4</sub>, filtered and concentrated under reduced pressure. The crude mixture was purified by flash column chromatography (10-15% CH<sub>3</sub>OH/CH<sub>2</sub>Cl<sub>2</sub>) to give D<sub>5</sub>-M<sub>2</sub>WJ<sub>352</sub> as a white solid (yield over three steps 21%).

*N*-[(5-D<sub>5</sub>-phenyl-1,2-oxazol-3-yl)methyl]adamantan-1-amine (**D5-M2WJ352**)

<sup>1</sup>H NMR (300 MHz, CD<sub>3</sub>OD): δ 6.83 (s, 1H), 3.88 (s, 2H), 2.10-2.08 (m, 3H), 1.77-1.70 (m, 12H). <sup>13</sup>CNMR (75 MHz, CD<sub>3</sub>OD): 171.22, 165.38, 129.68 (t, *J* = 24.71 Hz), 128.55, 126.32 (t, *J* = 24.17 Hz), 100.45, 52.46, 42.77, 37.63, 37.16, 31.01. EI-MS: *m/z* (M+H<sup>+</sup>): 314.2 (calculated), 314.8 (found).

*Synthesis of D15-M2WJ352 (N-[(5-phenyl-1,2-oxazol-3-yl)methyl]D15-adamantan-1-amine).*

Synthesis of **D15-M2WJ352** started with D15-amantadine and 5-phenyl-1,2-oxazole-3-carbaldehyde using reductive amination as reported <sup>3</sup>. <sup>1</sup>H NMR (300 MHz, CD<sub>3</sub>OD): δ 7.84-7.81 (m, 2H), 7.50-7.47 (m, 3H), 6.80 (s, 1H), 4.68 (s, 2H). <sup>13</sup>CNMR (75 MHz, CD<sub>3</sub>OD): 171.37, 166.29, 131.41, 130.19, 128.71, 126.76, 100.46, 99.71, 56.83. EI-MS: *m/z* (M+H<sup>+</sup>): 324.2 (calculated), 324.6 (found).

Synthesis of selectively isotope labeled M2(19-49) S31N peptide followed the optimized solid phase synthesis protocol as reported <sup>4</sup>.

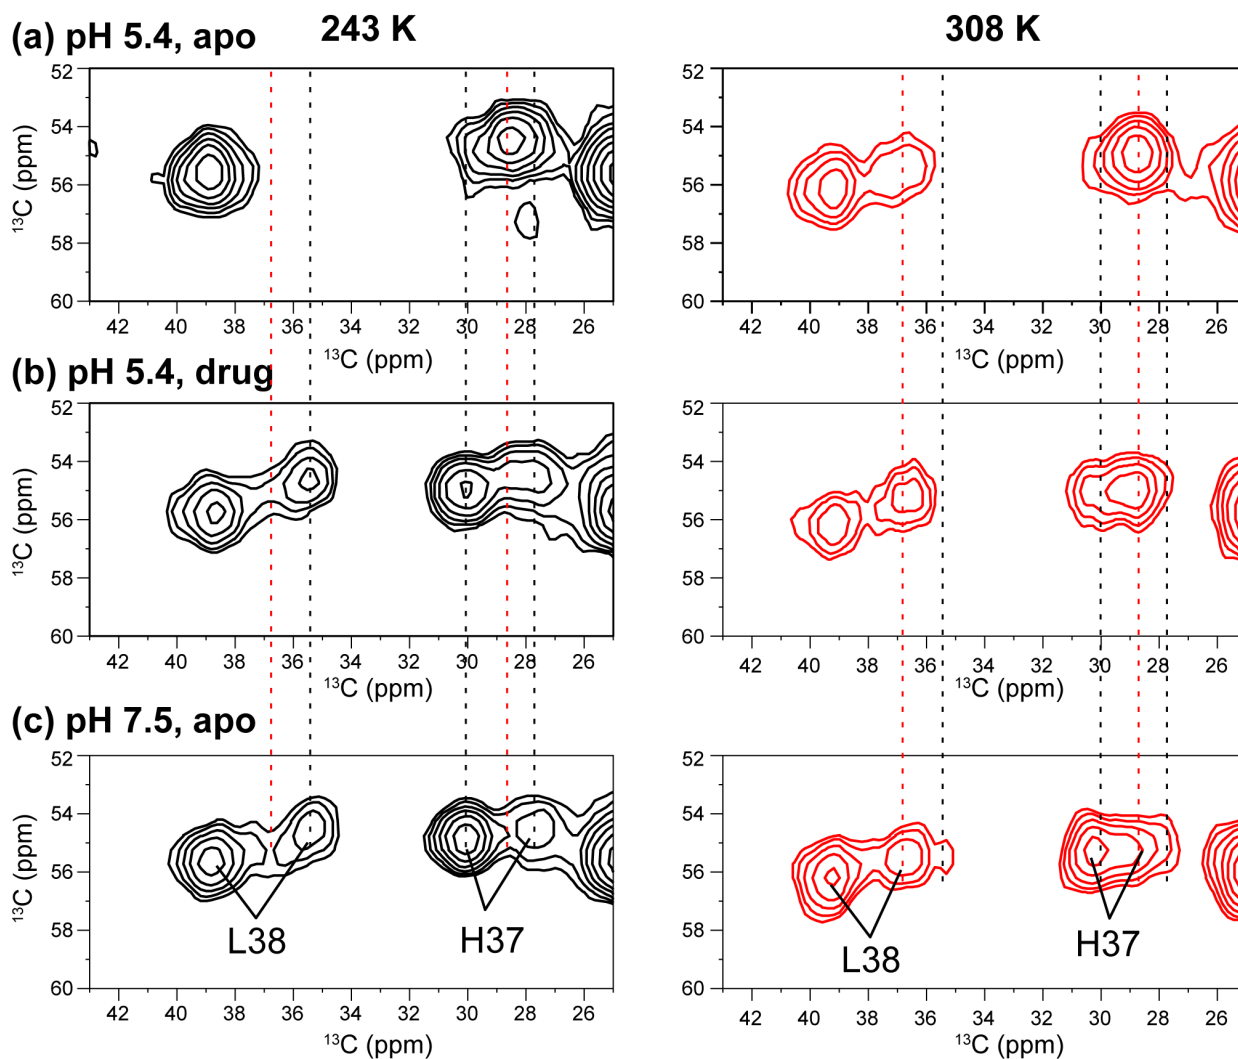

**Figure S2.** 2D  $^{13}\text{C}$ - $^{13}\text{C}$  correlation spectra showing the influence of pH, temperature and drug binding on the H37 and L38 chemical shifts in VGIHL-S31N-M2(19-49). (a) Apo peptide at pH 5.4. (b) Drug-bound peptide at pH 5.4. (c) Apo peptide at pH 7.5. Left column: 243 K spectra. Right column: 308 K spectra. L38  $\text{C}\beta$  exhibits two conformations. At low temperature, the minor conformation is absent in the low-pH apo peptide but significantly present in the other two samples. At high temperature, the minor conformer is populated in the low-pH apo peptide, but the chemical shift is changed by 1.2 ppm, suggesting conformational exchange with the major conformation. H37 exhibits a similar trend.

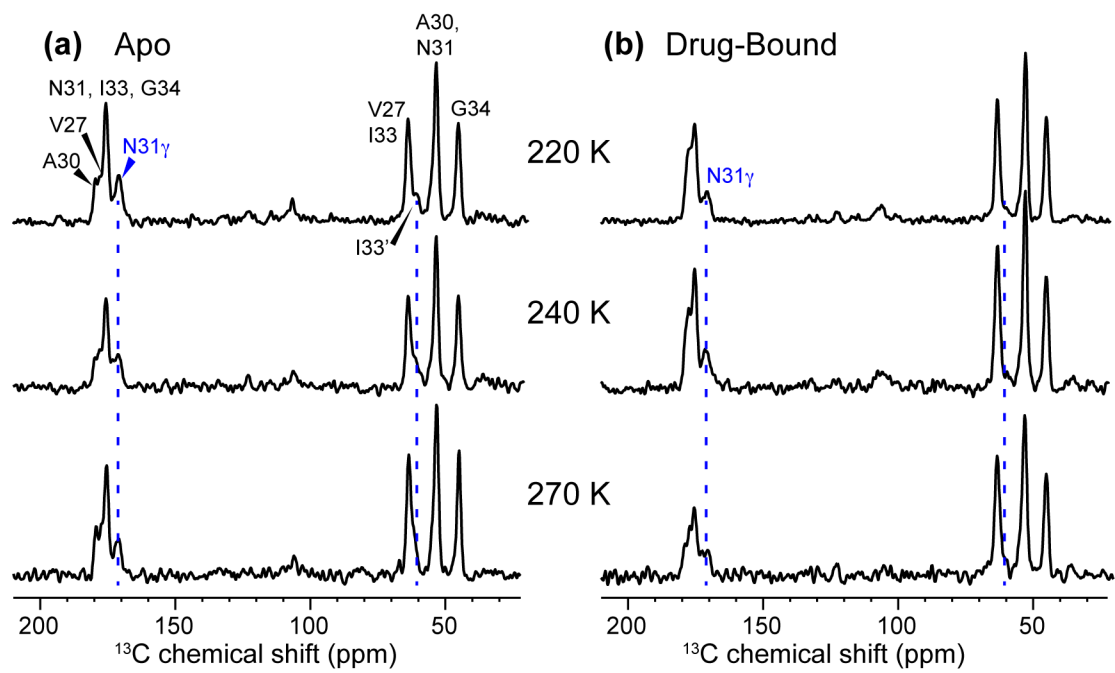

**Figure S3.** 1D  $^{15}\text{N}$ - $^{13}\text{C}$  dipolar filtered  $^{13}\text{C}$  spectra of (a) apo and (b) drug-bound VANIG-S31N-M2(19-49) from 220 K to 270 K. The N31 sidechain  $\text{C}\gamma$  chemical shift is unaffected by the drug.

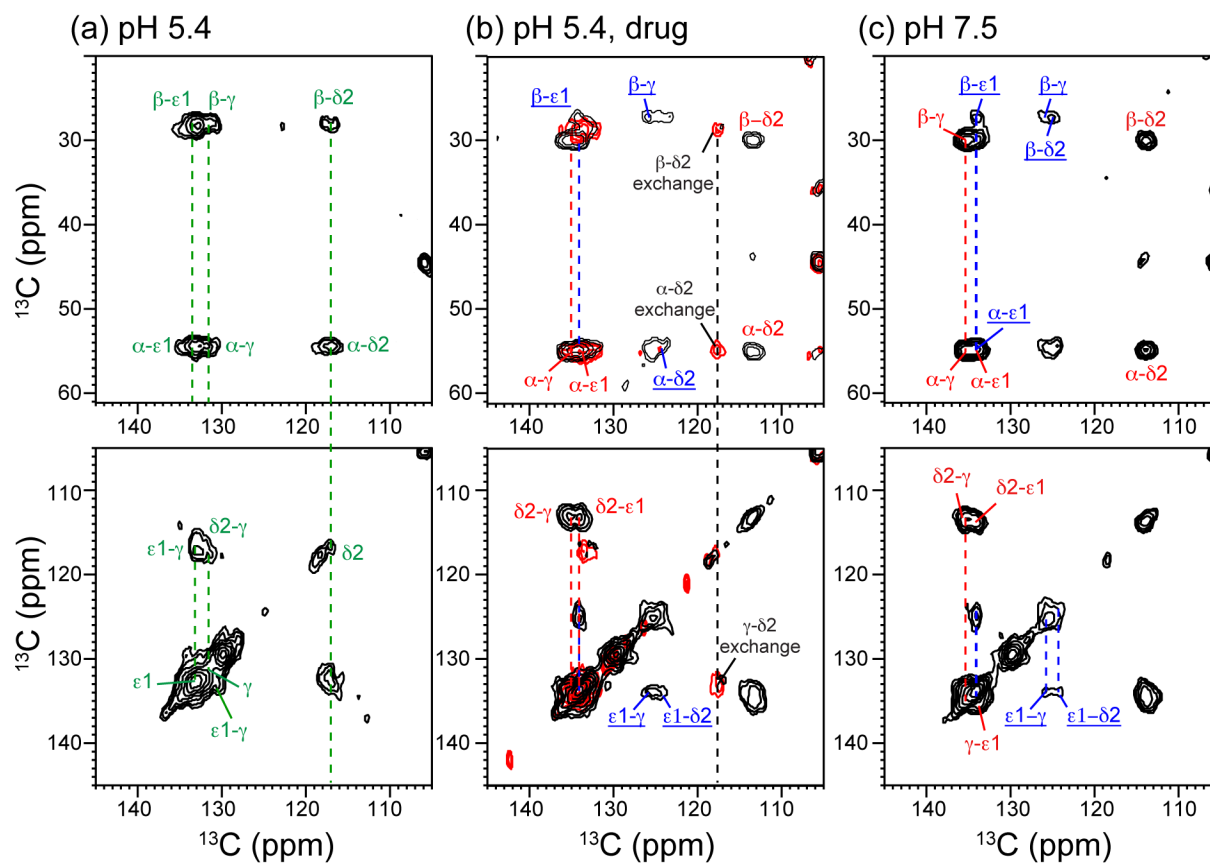

**Figure S4.** Aromatic region of the 2D  $^{13}\text{C}$ - $^{13}\text{C}$  correlation spectra of His37 in VGIHL-S31N-M2(19-49). The spectra were measured at 243 K under 7 kHz MAS. (a) Apo peptide at pH 5.4. (b) Drug-bound peptide at pH 5.4. (c) Apo peptide at pH 7.5. Superimposed in red in (b) is the 308 K spectrum of the drug-bound sample, showing C $\delta$ 2 exchange peaks.

**Table S1.** Different NMR samples used in this study.

| Peptide                | <sup>13</sup> C, <sup>15</sup> N labeled residues | Membrane | pH  | Drug : Tetramer ratio         |
|------------------------|---------------------------------------------------|----------|-----|-------------------------------|
| GIHL <sub>22-46</sub>  | G34, I35, H37, L38                                | DMPC     | 7.5 | Apo                           |
|                        |                                                   |          |     | 1 : 1 d <sub>5</sub> -WJ352   |
|                        |                                                   |          |     | 8 : 1 d <sub>5</sub> -WJ352   |
| VANIG <sub>19-49</sub> | V27, A30, N31, I33, G34                           | DMPC     | 6.5 | Apo                           |
|                        |                                                   |          |     | 1 : 1 d <sub>15</sub> -WJ352  |
|                        |                                                   |          |     | 10 : 1 d <sub>15</sub> -WJ352 |
| VGIHL <sub>19-49</sub> | V28, G34, I35, H37, L38                           | VM+      | 5.4 | Apo                           |
|                        |                                                   | VM+      | 7.5 | 10 : 1 WJ352                  |
|                        |                                                   | VM+      | 7.5 | Apo                           |

**Table S2.** <sup>15</sup>N and <sup>13</sup>C (referenced to TMS) chemical shifts of S31N-M2 in lipid membranes under various pH and drug binding conditions. Bold indicates sites with > 0.5 ppm chemical shift perturbation by the drug.

|     | Membrane | State       | N $\alpha$     | CO                             | C $\alpha$                   | C $\beta$                    | C $\gamma$ , $\gamma$ 1      | C $\gamma$ 2 | C $\delta$ , $\delta$ 1 | C $\delta$ 2 | C $\epsilon$ , $\epsilon$ 1 | N $\delta$ 1,2 | N $\epsilon$ 2 |
|-----|----------|-------------|----------------|--------------------------------|------------------------------|------------------------------|------------------------------|--------------|-------------------------|--------------|-----------------------------|----------------|----------------|
| V27 | DMPC     | Apo pH 6.5  | 119.8          | 177.3                          | 63.7                         | 29.4                         | 20.7                         | <b>19.8</b>  |                         |              |                             |                |                |
|     |          | Drug pH 6.5 | 120.1          | 177.3                          | 63.4                         | 29.4                         | 20.4                         | <b>19.3</b>  |                         |              |                             |                |                |
| V28 | VM+      | Apo pH 5.4  | <b>122.9</b>   | <b>176.3</b>                   | 65.2                         | 29.2                         | <b>20.3</b>                  | 19.5         |                         |              |                             |                |                |
|     |          | Drug pH 5.4 | 122.6          | <b>175.8</b>                   | 65.0                         | 28.9                         | <b>21.0</b>                  | 19.3         |                         |              |                             |                |                |
|     |          | Apo pH 7.5  | 122.0          | 176.0                          | 65.2                         | 28.9                         | 20.7                         | 19.3         |                         |              |                             |                |                |
| A30 | DMPC     | Apo pH 6.5  | 119.4          | <b>179.5</b>                   | <b>53.2</b>                  | <b>15.5</b>                  |                              |              |                         |              |                             |                |                |
|     |          | Drug pH 6.5 | 119.0          | <b>177.9</b>                   | <b>52.7</b>                  | <b>16.2</b>                  |                              |              |                         |              |                             |                |                |
| N31 | DMPC     | Apo pH 6.5  | 117.7          | <b>175.6</b><br><b>174.8</b>   | <b>53.5s</b><br><b>55.1w</b> | <b>35.4s</b><br><b>38.7w</b> | <b>171.3</b><br><b>170.5</b> |              |                         |              |                             | 106.0          |                |
|     |          | Drug pH 6.5 | 117.4          | <b>175.4</b>                   | <b>53.0</b>                  | <b>35.3</b>                  | <b>171.0</b>                 |              |                         |              |                             | 106.0          |                |
| I33 | DMPC     | Apo pH 6.5  | <b>119.0</b>   | 175.4                          | 63.7s<br><b>61.4w</b>        | 35.7                         | 28.4                         | <b>14.8</b>  | 12.0                    |              |                             |                |                |
|     |          | Drug pH 6.5 | <b>119.8</b>   | 175.6                          | 63.5s<br><b>62.4w</b>        | 35.4                         | 28.8                         | <b>15.6</b>  | 11.7                    |              |                             |                |                |
| G34 | VM+      | Apo pH 5.4  | 105.1<br>109.5 | 175.5<br>173.1                 | 44.9                         |                              |                              |              |                         |              |                             |                |                |
|     |          | Drug pH 5.4 | 105.6<br>109.7 | 175.0<br>173.0                 | 44.5                         |                              |                              |              |                         |              |                             |                |                |
|     |          | Apo pH 7.5  | 105.1<br>109.0 | 175.3<br>173.4                 | 44.8                         |                              |                              |              |                         |              |                             |                |                |
|     | DMPC     | Apo pH 6.5  | <b>105.0</b>   | <b>174.9s</b><br><b>173.2w</b> | 45.0                         |                              |                              |              |                         |              |                             |                |                |
|     |          | Drug pH 6.5 | <b>106.7</b>   | <b>175.1w</b><br><b>173.1s</b> | 45.4                         |                              |                              |              |                         |              |                             |                |                |
|     | DMPC     | Apo pH 7.5  | 107.3<br>104.7 | 175.0s<br>173.0w               | 44.9                         |                              |                              |              |                         |              |                             |                |                |
|     |          | Drug pH 7.5 | 107.3          | 175.0s                         | 45.2                         |                              |                              |              |                         |              |                             |                |                |



|     |      |             |                     |                              |                                           |                                           |                            |                            |                            |       |       |                             |                             |
|-----|------|-------------|---------------------|------------------------------|-------------------------------------------|-------------------------------------------|----------------------------|----------------------------|----------------------------|-------|-------|-----------------------------|-----------------------------|
|     |      |             |                     | 173.2s                       |                                           |                                           |                            |                            |                            |       |       |                             |                             |
| I35 | VM+  | Apo pH 5.4  | 123.2<br>118.2      | 174.8                        | 63.3                                      | 35.2                                      | <b>28.6</b>                | <b>15.6</b>                | 11.8                       |       |       |                             |                             |
|     |      | Drug pH 5.4 | 122.5<br>118.8      | 174.7<br>175.3               | 63.4                                      | 35.6                                      | <b>26.6</b><br><b>28.8</b> | <b>15.0</b><br><b>16.4</b> | 11.4<br>11.6               |       |       |                             |                             |
|     |      | Apo pH 7.5  | 122.1<br>119.0      | 174.7<br>175.4               | 63.6                                      | 35.3<br>35.6                              | 26.7<br>28.7               | 15.0<br>16.1               | 11.2<br>11.9               |       |       |                             |                             |
|     | DMPC | Apo pH 7.5  | 122.8               | 175.1                        | 63.5                                      | 35.4                                      | 28.0                       | 15.8                       | 11.8                       |       |       |                             |                             |
|     |      | Drug pH 7.5 | 122.2               | 175.4                        | 63.5                                      | 35.5                                      | 27.8                       | 15.7                       | 11.9                       |       |       |                             |                             |
| H37 | VM+  | Apo pH 5.4  | ---<br>117.4<br>--- | ---<br>174.2<br>---          | ---<br>54.8<br>---                        | ---<br>28.4<br>---                        |                            |                            |                            |       |       |                             |                             |
|     |      | Drug pH 5.4 | 117.2               | 174.2                        | <b>54.8</b><br><b>54.8</b><br><b>55.4</b> | <b>27.6</b><br><b>28.5</b><br><b>30.1</b> |                            |                            |                            |       |       |                             |                             |
|     |      | Apo pH 7.5  | 117.6               | 174.3                        | 54.8<br>---<br>55.3                       | 27.9<br>---<br>30.1                       |                            |                            |                            |       |       |                             |                             |
|     | DMPC | Apo pH 7.5  | 117.7               | 174.5                        | 55.1                                      | 29.9                                      | 135.2                      |                            |                            | 113.3 | 134.2 | 251.2 $\tau$<br>170.2 $\pi$ | 159.0 $\tau$<br>251.2 $\pi$ |
|     |      | Drug pH 7.5 | 118.0               | 174.5                        | <b>55.5</b><br><b>58.8</b>                | <b>30.0</b><br><b>29.1</b>                | 135.4                      |                            |                            | 113.5 | 134.0 | 165.9 $\pi$<br>252.0 $\tau$ | 165.9 $\tau$<br>252.0 $\pi$ |
| L38 | VM+  | Apo pH 5.4  | 117.4               | 175.2                        | 55.5                                      | 38.7                                      | 24.3                       |                            | 19.8                       |       |       |                             |                             |
|     |      | Drug pH 5.4 | 117.2               | <b>175.3</b><br><b>175.9</b> | <b>55.7</b><br><b>54.7</b>                | <b>38.6</b><br><b>35.4</b>                | 24.8<br>24.7               |                            | <b>19.8</b><br><b>21.3</b> |       |       |                             |                             |
|     |      | Apo pH 7.5  | 117.6               | 174.4<br>175.3               | 55.6<br>54.6                              | 38.7<br>35.4                              | 24.7<br>24.7               |                            | 19.7<br>21.1               |       |       |                             |                             |
|     | DMPC | Apo pH 7.5  | 117.7               | 175.4                        | 55.8                                      | 38.9                                      | 24.6                       | <b>19.9</b>                | <b>19.9</b>                |       |       |                             |                             |
|     |      | Drug pH 7.5 | 118.0               | 175.7                        | 55.9                                      | 39.3                                      | 24.7                       | <b>20.5</b>                | <b>20.5</b>                |       |       |                             |                             |

## References

- (1) Wang, J.; Wu, Y.; Ma, C.; Fiorin, G.; Wang, J.; Pinto, L. H.; Lamb, R. A.; Klein, M. L.; DeGrado, W. F. *Proc. Natl. Acad. Sci. U. S. A.* **2013**, *110*, 1315-1320.
- (2) Cady, S. D.; Schmidt-Rohr, K.; Wang, J.; Soto, C. S.; DeGrado, W. F.; Hong, M. *Nature* **2010**, *463*, 689-692.
- (3) Wang, J.; Ma, C.; Wang, J.; Jo, H.; Canturk, B.; Fiorin, G.; Pinto, L. H.; Lamb, R. A.; Klein, M. L.; DeGrado, W. F. *J. Med. Chem.* **2013**, *56*, 2804-2812.
- (4) Cady, S. D.; Wang, J.; Wu, Y.; DeGrado, W. F.; Hong, M. *J. Am. Chem. Soc.* **2011**, *133*, 4274-4284.
